# Supplementary material
Source: PubMed Central journal article supplement (PMC7977759)
Supplement: ryct200117suppa1.pdf [file ryct200117suppa1.pdf]

**Table E1. Clinical presentations of 47 adults and 14 pediatric patients**

| Case no.              | Age (Y/M) | Sex | Exposure               |                              |                  | Symptom |                    |       |            |          | Lab                            |                                      |                           |         |
|-----------------------|-----------|-----|------------------------|------------------------------|------------------|---------|--------------------|-------|------------|----------|--------------------------------|--------------------------------------|---------------------------|---------|
|                       |           |     | Recent travel to Wuhan | Exposure to Infected patient | Unknown exposure | Fever   | Myalgia or fatigue | Cough | Runny nose | Others   | White cell ( $\times 10^9/L$ ) | Lymphocyte count ( $\times 10^9/L$ ) | C-reactive protein (mg/L) |         |
| <b>Adult patients</b> |           |     |                        |                              |                  |         |                    |       |            |          |                                |                                      |                           |         |
| 1                     | 45 Y      | M   | Y                      | N                            | N                | Y       | Y                  | N     | N          | N        |                                | 3.18 ↓                               | 1.07                      | 1.14    |
| 2                     | 29 Y      | M   | N                      | Y                            | N                | Y       | Y                  | N     | N          | N        |                                | 3.68 ↓                               | 0.69 ↓                    | 2.48    |
| 3                     | 56 Y      | F   | Y                      | N                            | N                | Y       | N                  | Y     | Y          | N        |                                | 2.59 ↓                               | 1.25                      | 4.99    |
| 4                     | 69 Y      | M   | Y                      | N                            | N                | Y       | N                  | N     | N          | N        |                                | 2.55 ↓                               | 1.43                      | 2.34    |
| 5                     | 44 Y      | F   | N                      | N                            | Y                | Y       | N                  | N     | N          | N        |                                | 3.05 ↓                               | 0.48 ↓                    | 6.64 ↑  |
| 6                     | 81 Y      | M   | Y                      | N                            | N                | N       | N                  | Y     | N          | N        |                                | 4.01                                 | 3.06                      | 4.1     |
| 7                     | 39 Y      | M   | N                      | Y                            | N                | Y       | N                  | Y     | N          | N        |                                | 2.44 ↓                               | 1.03                      | 7.43 ↑  |
| 8                     | 67 Y      | M   | N                      | Y                            | N                | Y       | N                  | N     | N          | N        |                                | 3.53 ↓                               | 1.07                      | 1.14    |
| 9                     | 73 Y      | F   | Y                      | N                            | N                | Y       | Y                  | N     | N          | N        |                                | 5.9                                  | 1.14                      | 6.32 ↑  |
| 10                    | 46 Y      | F   | Y                      | N                            | N                | N       | N                  | Y     | N          | N        |                                | 3.07 ↓                               | 0.72 ↓                    | 0.76    |
| 11                    | 39 Y      | M   | N                      | Y                            | N                | Y       | N                  | N     | N          | N        |                                | 9.18                                 | 1.25                      | 1.32    |
| 12                    | 62 Y      | F   | N                      | Y                            | N                | Y       | Y                  | N     | N          | N        |                                | 3.57 ↓                               | 0.39 ↓                    | 8.09 ↑  |
| 13                    | 68 Y      | M   | Y                      | N                            | N                | Y       | N                  | N     | N          | N        |                                | 4.59                                 | 1.23                      | 1.73    |
| 14                    | 59 Y      | M   | Y                      | N                            | N                | Y       | Y                  | N     | N          | diarrhea |                                | 3.46 ↓                               | 1.27                      | 6.63 ↑  |
| 15                    | 54 Y      | F   | N                      | Y                            | N                | N       | N                  | Y     | N          | N        |                                | 4.58                                 | 1.18                      | 16.61 ↑ |
| 16                    | 49 Y      | F   | N                      | N                            | Y                | Y       | N                  | N     | N          | N        |                                | 3.12 ↓                               | 0.78 ↓                    | 1.81    |
| 17                    | 23 Y      | M   | Y                      | N                            | N                | Y       | Y                  | N     | N          | N        |                                | 4.08                                 | 0.95                      | 1.25    |
| 18                    | 40 Y      | F   | N                      | Y                            | N                | Y       | N                  | Y     | Y          | N        |                                | 2.07 ↓                               | 1.13                      | 13.4 ↑  |
| 19                    | 72 Y      | M   | N                      | Y                            | N                | Y       | N                  | N     | N          | N        |                                | 3.96 ↓                               | 1.21                      | 0.92    |
| 20                    | 66 Y      | F   | Y                      | N                            | N                | Y       | Y                  | N     | N          | N        |                                | 4.08                                 | 1.8                       | 35 ↑    |
| 21                    | 57 Y      | M   | Y                      | N                            | N                | Y       | N                  | Y     | N          | N        |                                | 6.26                                 | 1.15                      | 11.7 ↑  |
| 22                    | 64 Y      | M   | Y                      | N                            | N                | N       | N                  | Y     | N          | N        |                                | 1.27 ↓                               | 4.19 ↑                    | 1.29    |
| 23                    | 56 Y      | F   | N                      | Y                            | N                | Y       | Y                  | N     | N          | N        |                                | 12.49 ↑                              | 0.91                      | 68.96 ↑ |
| 24                    | 32 Y      | M   | N                      | Y                            | N                | Y       | N                  | N     | N          | N        |                                | 1.78 ↓                               | 0.95                      | 3.09 ↑  |
| 25                    | 46 Y      | F   | Y                      | N                            | N                | Y       | Y                  | N     | N          | N        |                                | 10.05 ↑                              | 0.64 ↓                    | 12.15 ↑ |
| 26                    | 20 Y      | M   | Y                      | N                            | N                | Y       | Y                  | N     | N          | N        |                                | 4.08                                 | 2.06                      | 4.28    |
| 27                    | 31 Y      | M   | Y                      | N                            | N                | Y       | Y                  | N     | N          | N        |                                | 3.57 ↓                               | 0.69 ↓                    | 3.09    |
| 28                    | 49 Y      | F   | Y                      | N                            | N                | Y       | N                  | N     | N          | N        |                                | 3.76 ↓                               | 1.98                      | 18.16 ↑ |
| 29                    | 53 Y      | M   | N                      | Y                            | N                | Y       | Y                  | N     | N          | N        |                                | 6.66                                 | 0.87                      | 1.09    |
| 30                    | 76 Y      | M   | N                      | Y                            | N                | N       | N                  | Y     | Y          | N        |                                | 4.42                                 | 2.34                      | 0.86    |
| 31                    | 38 Y      | M   | Y                      | N                            | N                | N       | N                  | Y     | N          | N        |                                | 3.43 ↓                               | 0.72 ↓                    | 23.65 ↑ |
| 32                    | 28 Y      | F   | Y                      | N                            | N                | Y       | Y                  | N     | N          | N        |                                | 4.61                                 | 1.95                      | 8.29 ↑  |
| 33                    | 32 Y      | F   | Y                      | N                            | N                | Y       | Y                  | N     | N          | N        |                                | 5.94                                 | 1.38                      | 4.37    |
| 34                    | 67 Y      | M   | Y                      | N                            | N                | Y       | N                  | N     | N          | N        |                                | 7.37                                 | 2.18                      | 2.98    |
| 35                    | 68 Y      | F   | N                      | Y                            | N                | N       | N                  | Y     | N          | N        |                                | 2.91 ↓                               | 0.61 ↓                    | 19.08 ↑ |
| 36                    | 56 Y      | M   | N                      | N                            | Y                | Y       | Y                  | N     | N          | N        |                                | 5.65                                 | 1.83                      | 2.76    |
| 37                    | 50 Y      | M   | N                      | Y                            | N                | Y       | Y                  | N     | N          | N        |                                | 3.86 ↓                               | 0.79 ↓                    | 3.46    |
| 38                    | 29 Y      | F   | Y                      | N                            | N                | Y       | Y                  | N     | N          | N        |                                | 5.73                                 | 1.24                      | 0.87    |
| 39                    | 64 Y      | M   | Y                      | N                            | N                | Y       | N                  | N     | N          | N        |                                | 5.94                                 | 1.37                      | 2.69    |
| 40                    | 32 Y      | F   | Y                      | N                            | N                | Y       | N                  | N     | N          | N        |                                | 6.26                                 | 1.06                      | 2.98    |

|                           |      |   |   |   |   |   |   |   |   |          |         |        |         |
|---------------------------|------|---|---|---|---|---|---|---|---|----------|---------|--------|---------|
| 41                        | 67 Y | M | N | Y | N | Y | Y | N | N | N        | 6.26    | 2.17   | 6.87    |
| 42                        | 30 Y | M | N | Y | N | N | N | N | N | diarrhea | 5.69    | 2.91   | 9.08 ↑  |
| 43                        | 48 Y | F | Y | N | N | Y | Y | N | N | N        | 11.46 ↑ | 0.28 ↓ | 10.63 ↑ |
| 44                        | 53 Y | M | Y | N | N | Y | Y | N | N | N        | 6.54    | 1.97   | 2.84    |
| 45                        | 55 Y | M | Y | N | N | Y | N | Y | N | N        | 2.98 ↓  | 0.17 ↓ | 2.05    |
| 46                        | 23 Y | F | Y | N | N | Y | N | N | N | N        | 4.38    | 1.09   | 4.18    |
| 47                        | 61 Y | M | N | Y | N | Y | Y | N | N | N        | 3.12 ↓  | 0.68 ↓ | 9.84 ↑  |
| <b>Pediatric patients</b> |      |   |   |   |   |   |   |   |   |          |         |        |         |
| 1                         | 3 Y  | M | Y | N | N | N | N | Y | N | N        | 9.26    | 2.09   | 2.89    |
| 2                         | 5 Y  | F | N | Y | N | Y | Y | N | N | N        | 13.35 ↑ | 1.28 ↓ | 97 ↑    |
| 3                         | 2 M  | M | Y | N | N | Y | N | N | N | N        | 8.13    | 3.17   | 3.09    |
| 4                         | 10 Y | F | Y | N | N | N | N | Y | N | N        | 4.24    | 3.28   | 28.7    |
| 5                         | 8 Y  | F | N | Y | N | N | N | N | Y | N        | 6.57    | 2.13   | 3.87    |
| 6                         | 4 Y  | M | Y | N | N | Y | Y | N | N | N        | 3.45 ↓  | 0.95 ↓ | 74.09 ↑ |
| 7                         | 2 Y  | M | Y | N | N | N | N | Y | N | N        | 2.35 ↓  | 1.56   | 0.87    |
| 8                         | 4 Y  | F | Y | N | N | N | N | Y | N | N        | 5.67    | 3.09   | 2.75    |
| 9                         | 8 M  | M | N | Y | N | Y | Y | N | N | N        | 3.67 ↓  | 2.18   | 12.6 ↑  |
| 10                        | 3 M  | M | Y | N | N | N | N | N | N | N        | 9.67    | 2.67   | 3.09    |
| 11                        | 6 Y  | M | N | Y | N | Y | N | N | N | N        | 7.36    | 3.27   | 6.94    |
| 12                        | 8 Y  | F | Y | N | N | N | N | Y | Y | N        | 3.28 ↓  | 1.45 ↓ | 18.96 ↑ |
| 13                        | 10 Y | F | Y | N | N | N | N | Y | N | N        | 9.05    | 2.91   | 7.37    |
| 14                        | 5 Y  | M | Y | N | N | Y | N | N | N | N        | 5.98    | 3.08   | 3.96    |

Note.—Normal reference range of white blood cell:  $4 \times 10^9/L \sim 10 \times 10^9/L$ . Normal reference range of lymphocyte count:  $0.8 \times 10^9/L \sim 4.0 \times 10^9/L$  (adult),  $1.55 \times 10^9/L \sim 4.8 \times 10^9/L$  (child).
